# Supplementary material for: Ultrasound-Based Recovery of Anti-Inflammatory and Antimicrobial Extracts of the Acidophilic Microalga Coccomyxa onubensis
Source: MDPI journal article supplement (doi:10.3390/md21090471), 2023-08-27
Supplement: s1 [file s1]

# Ultrasound-Based Recovery of Anti-Inflammatory and Antimicrobial Extracts of the Acidophilic Microalga *Coccomyxa onubensis*

Mari Carmen Ruiz-Domínguez <sup>1,\*</sup>, María Robles <sup>2</sup>, Lidia Martín <sup>2</sup>, Álvaro Beltrán <sup>3</sup>, Riccardo Gava <sup>3</sup>, María Cuaresma <sup>2</sup>, Francisco Navarro <sup>4</sup> and Carlos Vílchez <sup>2</sup>

- <sup>1</sup> Laboratorio de Microencapsulación de Compuestos Bioactivos (LAMICBA), Departamento de Ciencias de los Alimentos y Nutrición, Facultad de Ciencias de la Salud, Universidad de Antofagasta, Antofagasta 1240000, Chile
- <sup>2</sup> Algal Biotechnology, CIDERTA-RENSMA, Faculty of Experimental Sciences, University of Huelva, 21007 Huelva, Spain; maria.robles@dqcm.uhu.es (M.R.); lidia.martin@dqcm.uhu.es (L.M.); maria.cuaresma@dqcm.uhu.es (M.C.); cvilchez@dqcm.uhu.es (C.V.)
- <sup>3</sup> Bioplagen S.L., Av. Castilleja de la Cuesta, 20-22, Bollullos de la Mitación, 41110 Seville, Spain; alvarobeltran@bioplagen.com (Á.B.); riccardogava@bioplagen.com (R.G.)
- <sup>4</sup> Cell Alterations by Exogenous Agents, RENSMA and, Department of Integrated Sciences, Faculty of Experimental Sciences, University of Huelva, 21007 Huelva, Spain; fnavarro@uhu.es
- \* Correspondence: maria.ruiz@uantof.cl; Tel.: +56-552-633-660

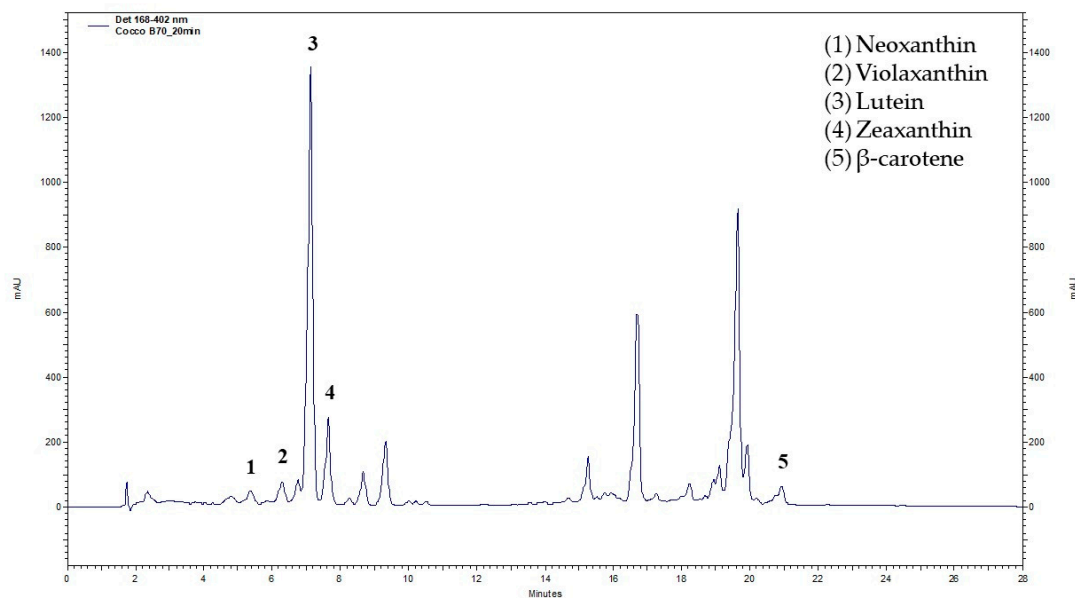

Figure S1. HPLC profile of main carotenoids presents in *C. onubensis*

**Table S1.** Regression coefficients and p-Value for Extraction yield and lutein recovery in their original units and statistics for the fit obtained by multiple linear regression using ultrasonic bath equipment.

| Terms of the model                             | Extraction yield |                | Lutein Recovery         |                |
|------------------------------------------------|------------------|----------------|-------------------------|----------------|
|                                                | <i>Estimate</i>  | <i>P-Value</i> | <i>Estimate</i>         | <i>P-Value</i> |
| constant                                       | 29.5221          |                | 119.818                 |                |
| A: T                                           | 7.09833          | 0.0000*        | 20.5667                 | 0.0285*        |
| B: t                                           | 2.12833          | 0.0028*        | 9.88333                 | 0.2030         |
| T × T                                          | -1.29026         | 0.0845         | 8.51895                 | 0.4495         |
| T × t                                          | -0.3175          | 0.5361         | -7.505                  | 0.4056         |
| T × t                                          | -5.69026         | 0.0002*        | -27.3511                | 0.0464*        |
| Statistic for the goodness of fit of the model |                  |                |                         |                |
| R <sup>2</sup>                                 | 0.989558         |                | R <sup>2</sup>          | 0.793382       |
| adjusted R <sup>2</sup>                        | 0.979115         |                | adjusted R <sup>2</sup> | 0.586764       |
| RSD                                            | 0.370359         |                | RSD                     | 9.39499        |
| P                                              | 0.2282           |                | P                       | 0.0471         |

Note: R<sup>2</sup>–determination coefficient, adjusted R<sup>2</sup>, RSD–residual standard deviation, P-value of the lack-of-fit test for the model; \* - significant coefficients of the model, T–Temperature (°C), and t – extraction time (min)

**Table S2.** Regression coefficients and p-Value for extraction yield lutein recovery in their original units and statistics for the fit obtained by multiple linear regression using ultrasonic probe equipment.

| Terms of the model                             | Extraction yield |                | Lutein Recovery         |                |
|------------------------------------------------|------------------|----------------|-------------------------|----------------|
|                                                | <i>Estimate</i>  | <i>P-Value</i> | <i>Estimate</i>         | <i>P-Value</i> |
| constant                                       | 15.4821          |                | 60.4063                 |                |
| A: Pi                                          | -0.188333        | 0.3668         | 11.335                  | 0.0348*        |
| B: t                                           | 1.01833          | 0.0030*        | 4.34333                 | 0.3207         |
| Pi × Pi                                        | 0.899737         | 0.0275         | 12.3692                 | 0.0970         |
| Pi × t                                         | 0.205            | 0.4184         | -10.615                 | 0.0792         |
| T × t                                          | -0.0702632       | 0.8195         | -14.8358                | 0.0582         |
| Statistic for the goodness of fit of the model |                  |                |                         |                |
| R <sup>2</sup>                                 | 0.849697         |                | R <sup>2</sup>          | 0.817347       |
| adjusted R <sup>2</sup>                        | 0.779571         |                | adjusted R <sup>2</sup> | 0.634695       |
| RSD                                            | 0.26075          |                | RSD                     | 5.13633        |
| P                                              | 0.1167           |                | P                       | 0.1087         |

Note: R<sup>2</sup>—determination coefficient, adjusted R<sup>2</sup>, RSD—residual standard deviation, P-value of the lack-of-fit test for the model; \* - significant coefficients of the model, Pi—Pulse interval (s/s), and t – extraction time (min)
